# Supplementary material for: A robust methodology for PEC performance analysis of photoanodes using machine learning and analytical data
Source: Royal Society of Chemistry journal article supplement (doi:10.1039/d4an00439f), 2024-01-01
Supplement: d4an00439f1.pdf [file d4an00439f1.pdf]

*Supporting Information*

Robust methodology for PEC performance analysis of  
photoanodes using machine learning and analytical data

Moeko Tajima,<sup>1†</sup> Yuya Nagai,<sup>1†</sup> Cyan Chen,<sup>1</sup> Zhenhua Pan<sup>1</sup> and Kenji Katayama<sup>1\*</sup>

<sup>1</sup> Department of Applied Chemistry, Chuo University, Tokyo 112-8551, Japan;

<sup>†</sup> Equally contributed

\*Corresponding authors:

K. Katayama, Phone: +81-3-3817-1913, E-mail: [kkata@kc.chuo-u.ac.jp](mailto:kkata@kc.chuo-u.ac.jp)

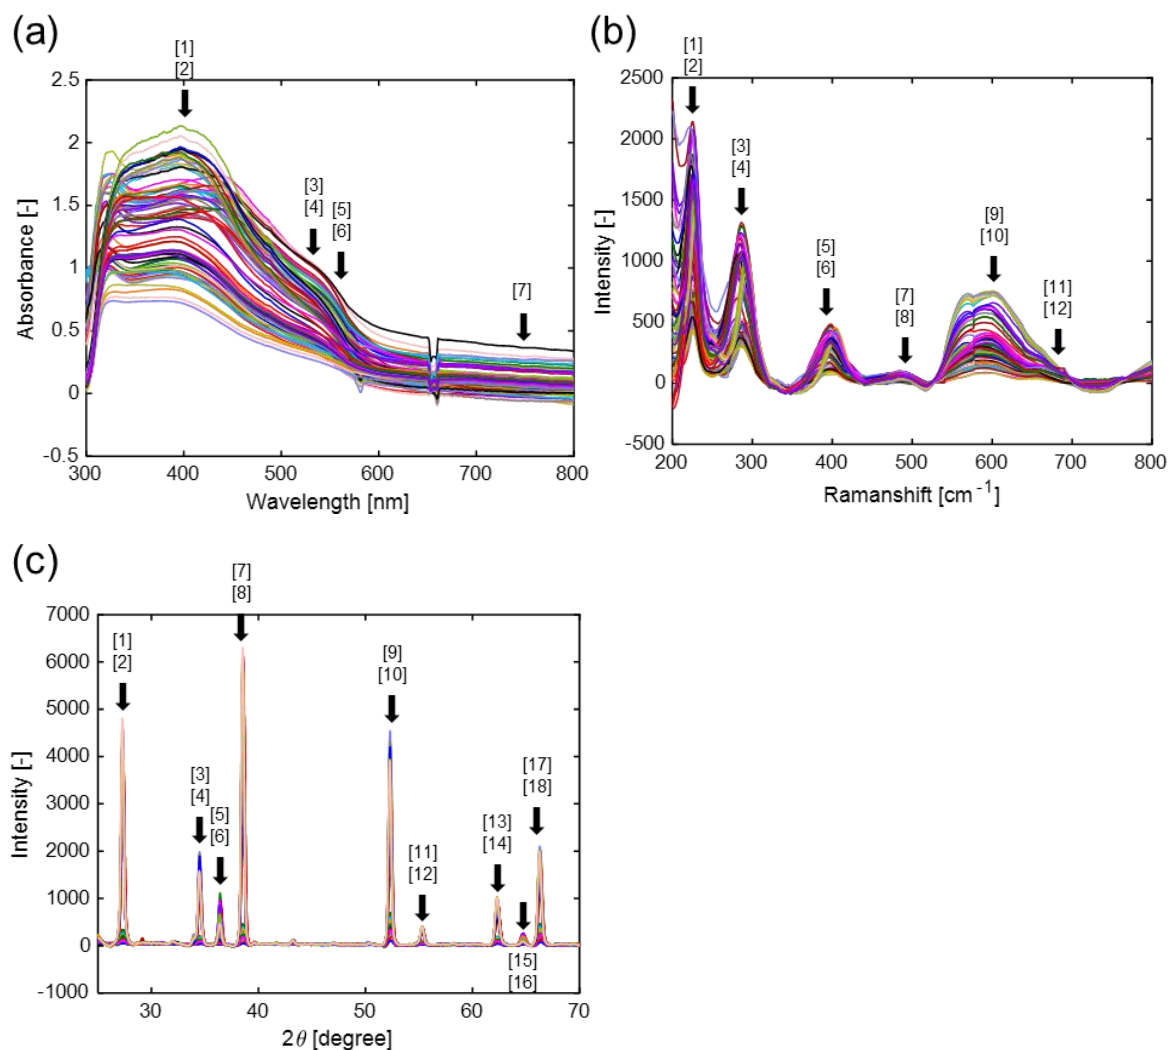

Figure S1 The analytical data for the hematite electrodes; (a) UV/vis spectra, (b) Raman spectra, and (c) XRD patterns. Each separated region is shown in black arrows with labels. The peak intensities and positions, the slope and positions were used as descriptors. The name and explanation of these descriptors from the analytical data were shown in the following table.

Table S1 The abbreviations of the descriptor names for the analytical data in Figure S1 and their explanation.

| Analytical method                                 | Descriptor name                                       | Descriptor explanation                                                                              |                                  |
|---------------------------------------------------|-------------------------------------------------------|-----------------------------------------------------------------------------------------------------|----------------------------------|
| UV/Vis                                            | [1] UV Vis pks abs<br>[2] UV Vis pks locs             | Peak intensity and position around 400 nm                                                           |                                  |
|                                                   | [3] UV_Vis_shol_posi_abs<br>[4] UV_Vis_shol_posi_locs | Absolute intensity value at the 1 <sup>st</sup> derivative maximum and its location in 500 – 573 nm |                                  |
|                                                   | [5] UV_Vis_shol_neg_abs<br>[6] UV_Vis_shol_neg_locs   | Absolute intensity value at the 1 <sup>st</sup> derivative minimum and its location in 500 – 573 nm |                                  |
|                                                   | [7] UV_Vis_average_abs                                | Average intensity in 680~800 nm                                                                     |                                  |
|                                                   | Raman                                                 | [1] Raman_pk1_posi_int<br>[2] Raman_pk1_posi_loc                                                    | Intensity and position of peak 1 |
|                                                   |                                                       | [3] Raman_pk2_posi_int<br>[4] Raman_pk2_posi_loc                                                    | Intensity and position of peak 2 |
|                                                   |                                                       | [5] Raman_pk3_posi_int<br>[6] Raman_pk3_posi_loc                                                    | Intensity and position of peak 3 |
| [7] Raman_pk4_posi_int<br>[8] Raman_pk4_posi_loc  |                                                       | Intensity and position of peak 4                                                                    |                                  |
| [9] Raman_pk5_posi_int<br>[10] Raman_pk5_posi_loc |                                                       | Intensity and position of peak 5                                                                    |                                  |
| [11] Raman_pk_shol_int<br>[12] Raman_pk_shol_loc  |                                                       | Intensity and position of the shoulder peak                                                         |                                  |
| XRD                                               |                                                       | [1] XRD_pk1_int<br>[2] XRD_pk1_loc                                                                  | Intensity and position of peak 1 |
|                                                   | [3] XRD_pk2_int<br>[4] XRD_pk2_loc                    | Intensity and position of peak 2                                                                    |                                  |
|                                                   | [5] XRD_pk3_int<br>[6] XRD_pk1_3oc                    | Intensity and position of peak 3                                                                    |                                  |
|                                                   | [7] XRD_pk4_int<br>[8] XRD_pk4_loc                    | Intensity and position of peak 4                                                                    |                                  |
|                                                   | [9] XRD_pk5_int                                       | Intensity and position of peak 5                                                                    |                                  |

|  |                                      |                                  |
|--|--------------------------------------|----------------------------------|
|  | [10] XRD_pk5_loc                     |                                  |
|  | [11] XRD_pk6_int<br>[12] XRD_pk6_loc | Intensity and position of peak 6 |
|  | [13] XRD_pk7_int<br>[14] XRD_pk7_loc | Intensity and position of peak 7 |
|  | [15] XRD_pk8_int<br>[16] XRD_pk8_loc | Intensity and position of peak 8 |
|  | [17] XRD_pk9_int<br>[18] XRD_pk9_loc | Intensity and position of peak 9 |

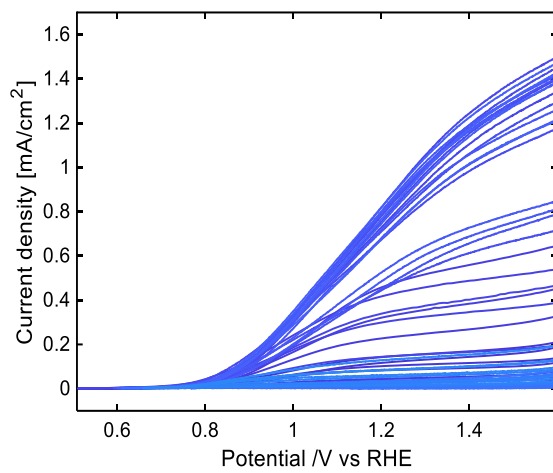

Figure S2 The current–voltage curves for 75 samples of hematite photoanodes. The potential is given versus RHE.

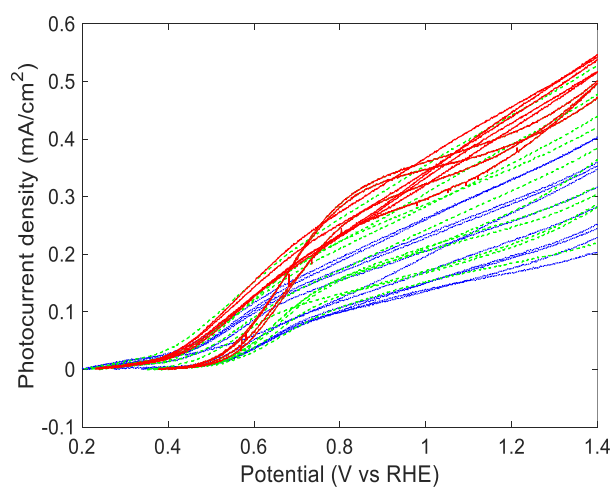

Figure S3 The current–voltage curves for thirty-two samples of  $\text{BiVO}_4$  photoanodes are shown. The potential is indicated versus reversible hydrogen electrode (RHE). Blue, green, and red curves show the current–voltage curves for the samples with the repeated number of the spin coating of 9, 11, and 13 times.

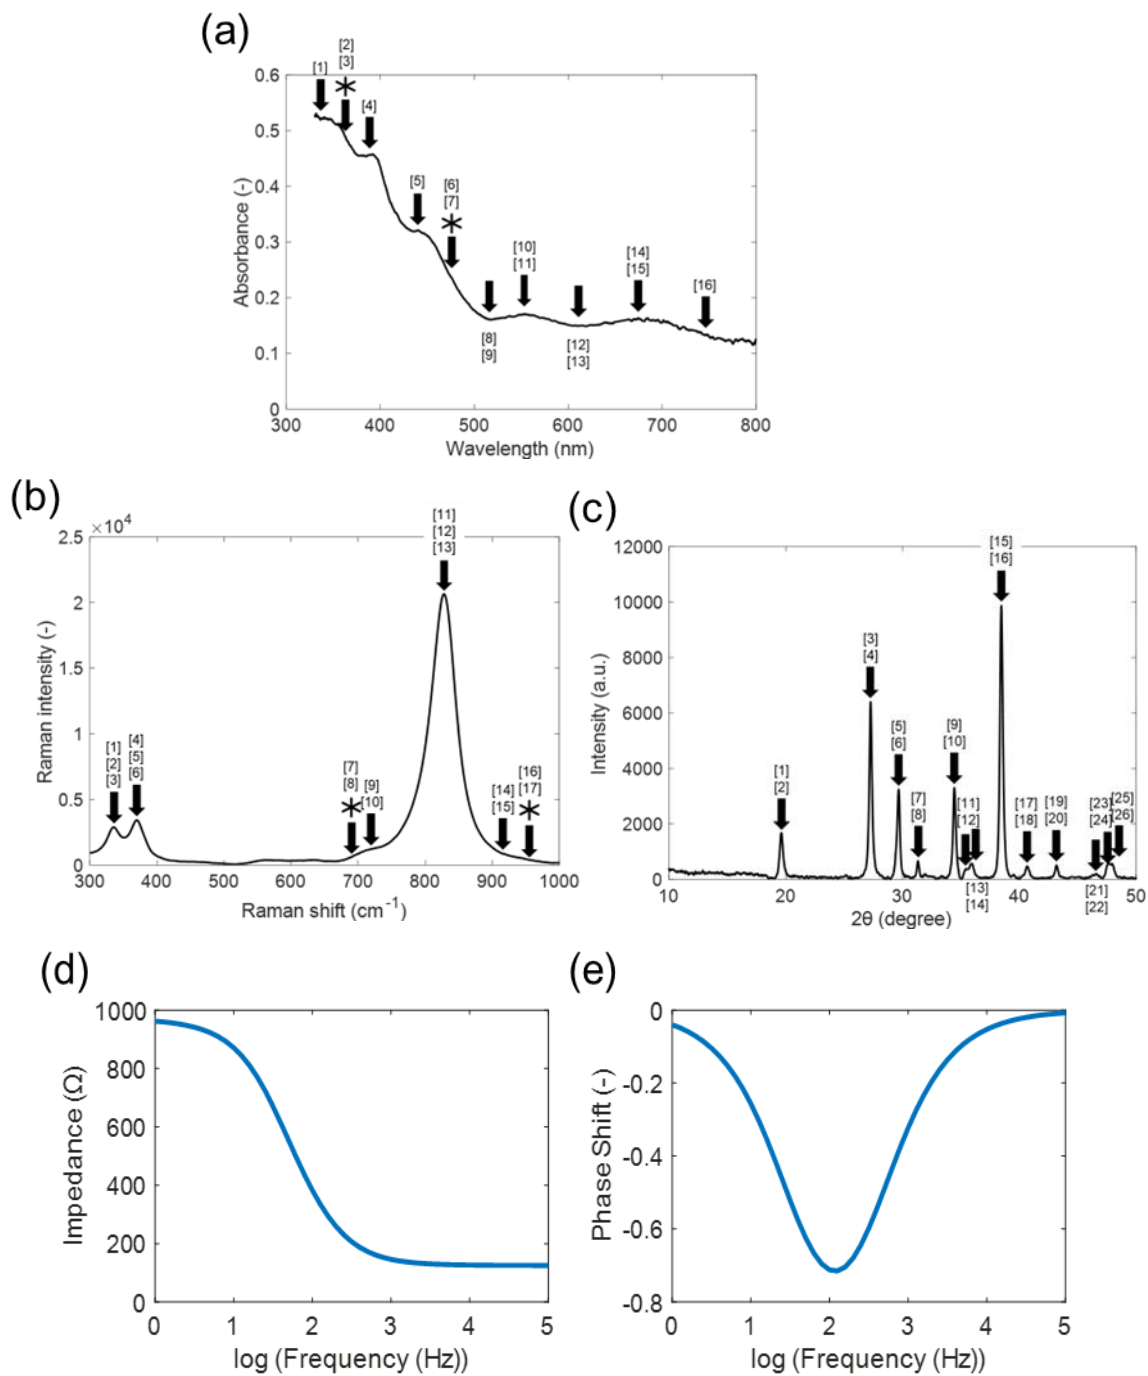

Figure S4 An example of the analytical data for BiVO<sub>4</sub> electrode is shown with an indication of features in the spectra and patterns; (a) UV/Vis spectrum, (b) XRD pattern, and (c) Raman spectrum, (d)(e) impedance and phase shift of PEIS. The intensities, positions and width were taken as feature values at the arrows and the slope was taken at (\*). The name and explanation of these descriptors from the analytical data were shown in the following table.

Table S2 The abbreviations of the descriptor names for the analytical data in Figure S4 and their explanation. –

| Analytical method | Descriptor name                              | Descriptor explanation                                                  |                                                                     |
|-------------------|----------------------------------------------|-------------------------------------------------------------------------|---------------------------------------------------------------------|
| UV Vis            | [1] UV_Vis_average_330_350                   | Average intensity in 330–350 nm                                         |                                                                     |
|                   | [2] UV_pk_slope1_int<br>[3] UV_pk_slope1_loc | Maximum value and its location of 1st derivative spectrum in 350–380 nm |                                                                     |
|                   | [4] UV_Vis_average_380_390                   | Average intensity in 380–390 nm                                         |                                                                     |
|                   | [5] UV_Vis_average_430_440                   | Average intensity in 430–440 nm                                         |                                                                     |
|                   | [6] UV_pk_slope2_int<br>[7] UV_pk_slope2_loc | Maximum value and its location of 1st derivative spectrum in 440–500 nm |                                                                     |
|                   | [8] UV_pk_nega1_int<br>[9] UV_pk_nega1_loc   | 1 <sup>st</sup> negative peak intensity and position in 500–700 nm      |                                                                     |
|                   | [10] UV_pk1_int<br>[11] UV_pk1_loc           | 1 <sup>st</sup> peak intensity and position in 500–700 nm               |                                                                     |
|                   | [12] UV_pk_nega2_int<br>[13] UV_pk_nega2_loc | 2 <sup>nd</sup> negative peak intensity and position in 500–700 nm      |                                                                     |
|                   | [14] UV_pk2_int<br>[15] UV_pk2_loc           | 2 <sup>nd</sup> peak intensity and position in 500–700 nm               |                                                                     |
|                   | [16] UV_Vis_average_700_800                  | Average intensity in 700–800 nm                                         |                                                                     |
|                   | Raman                                        | [1] Raman_pk1_int<br>[2] Raman_pk1_loc<br>[3] Raman_pk1_wid             | Intensity, position, and width of peak 1                            |
|                   |                                              | [4] Raman_pk2_int<br>[5] Raman_pk2_loc<br>[6] Raman_pk2_wid             | Intensity, position, and width of peak 2                            |
|                   |                                              | [7] Raman_shoulder_slope_loc<br>[8] Raman_shoulder_slope                | Maximum value of slope and its location in 650–800 cm <sup>-1</sup> |
|                   |                                              | [9] Raman_shoulder_end_loc                                              | Absolute intensity value at the                                     |



|     |                                                                |                                                                                                                   |
|-----|----------------------------------------------------------------|-------------------------------------------------------------------------------------------------------------------|
|     | [10] Raman_sholder_end_int                                     | 1 <sup>st</sup> derivative maximum and its location in 650 – 800 cm <sup>-1</sup>                                 |
|     | [11] Raman_pk3_int<br>[12] Raman_pk3_loc<br>[13] Raman_pk3_wid | Intensity and position of peak 3                                                                                  |
|     | [14] Raman_shoulder_2_slope_loc<br>[15] Raman_shoulder_2_slope | Absolute intensity value at the 1 <sup>st</sup> derivative minimum and its location in 915 – 960 cm <sup>-1</sup> |
|     | [16] Raman_shoulder_2_loc<br>[17] Raman_shoulder_2_int         | Maximum negative value of slope and its location at 915 – 960 cm <sup>-1</sup>                                    |
| XRD | [1] XRD_pk1_int<br>[2] XRD_pk1_loc                             | Intensity and position of peak 1                                                                                  |
|     | [3] XRD_pk2_int<br>[4] XRD_pk2_loc                             | Intensity and position of peak 2                                                                                  |
|     | [5] XRD_pk3_int<br>[6] XRD_pk3_loc                             | Intensity and position of peak 3                                                                                  |
|     | [7] XRD_pk4_int<br>[8] XRD_pk4_loc                             | Intensity and position of peak 4                                                                                  |
|     | [9] XRD_pk5_int<br>[10] XRD_pk5_loc                            | Intensity and position of peak 5                                                                                  |
|     | [11] XRD_pk6_int<br>[12] XRD_pk6_loc                           | Intensity and position of peak 6                                                                                  |
|     | [13] XRD_pk7_int<br>[14] XRD_pk7_loc                           | Intensity and position of peak 7                                                                                  |
|     | [15] XRD_pk8_int<br>[16] XRD_pk8_loc                           | Intensity and position of peak 8                                                                                  |
|     | [17] XRD_pk9_int<br>[18] XRD_pk9_loc                           | Intensity and position of peak 9                                                                                  |
|     | [19] XRD_pk10_int<br>[20] XRD_pk10_loc                         | Intensity and position of peak 10                                                                                 |
|     | [21] XRD_pk11_int<br>[22] XRD_pk11_loc                         | Intensity and position of peak 11                                                                                 |
|     | [23] XRD_pk12_int<br>[24] XRD_pk12_loc                         | Intensity and position of peak 12                                                                                 |
|     | [25] XRD_pk13_int                                              | Intensity and position of peak                                                                                    |

|      |                                |                                                            |
|------|--------------------------------|------------------------------------------------------------|
|      | [26] XRD_pk13_loc              | 13                                                         |
| PEIS | EIS_R1, EIS_R2, EIS_C2, EIS_n2 | Fitting parameters analyzed by an equivalent circuit model |

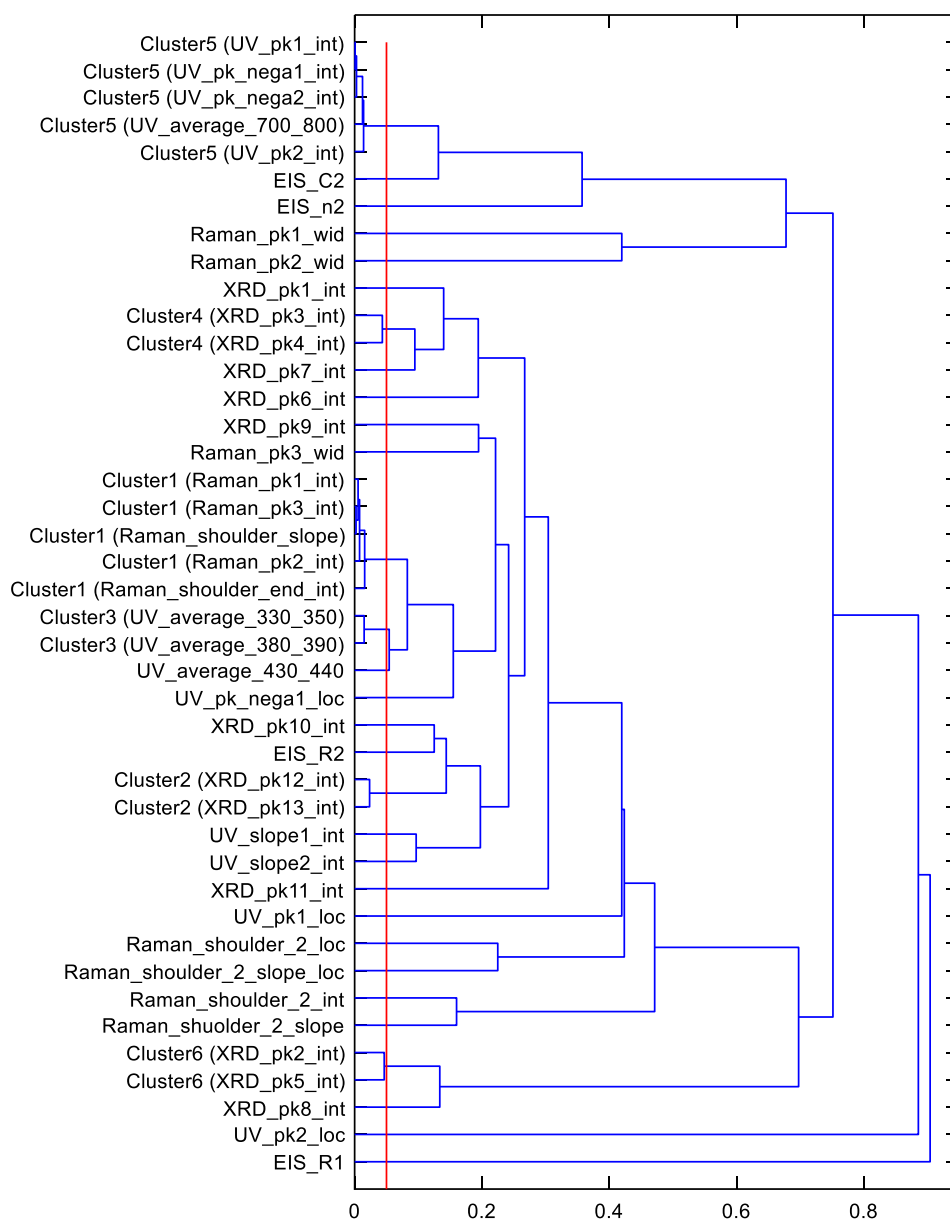

Figure S5 The dendrogram illustrates feature clustering for the analytical data features obtained from BiVO<sub>4</sub> photoanodes. The horizontal axis depicts the absolute cosine distance, while the vertical axis displays the name of features. The red line represents the clustering threshold.

Table S3

The list of the clustered features in the clustering analysis shown in Figure S5.

| Features name          | Cluster index |
|------------------------|---------------|
| Raman_pk1_int          | 1             |
| Raman_pk2_int          | 1             |
| Raman_pk3_int          | 1             |
| Raman_shoulder_slope   | 1             |
| Raman_shoulder_end_int | 1             |
| XRD_pk12_int           | 2             |
| XRD_pk13_int           | 2             |
| UV_average_330_350     | 3             |
| UV_average_380_390     | 3             |
| XRD_pk3_int            | 4             |
| XRD_pk4_int            | 4             |
| UV_pk1_int             | 5             |
| UV_pk2_int             | 5             |
| UV_pk_nega1_int        | 5             |
| UV_pk_nega2_int        | 5             |
| UV_average_700_800     | 5             |
| XRD_pk2_int            | 6             |
| XRD_pk5_int            | 6             |

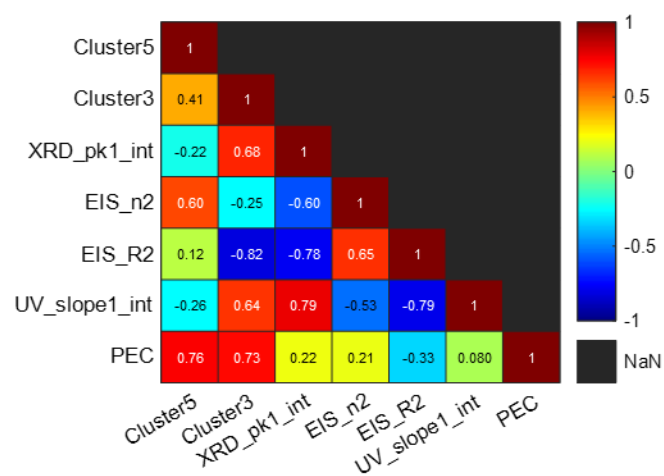

Figure S6 The correlation matrix of BiVO<sub>4</sub> photoanode data. The color represents the value of the correlation coefficients (cosine similarity).

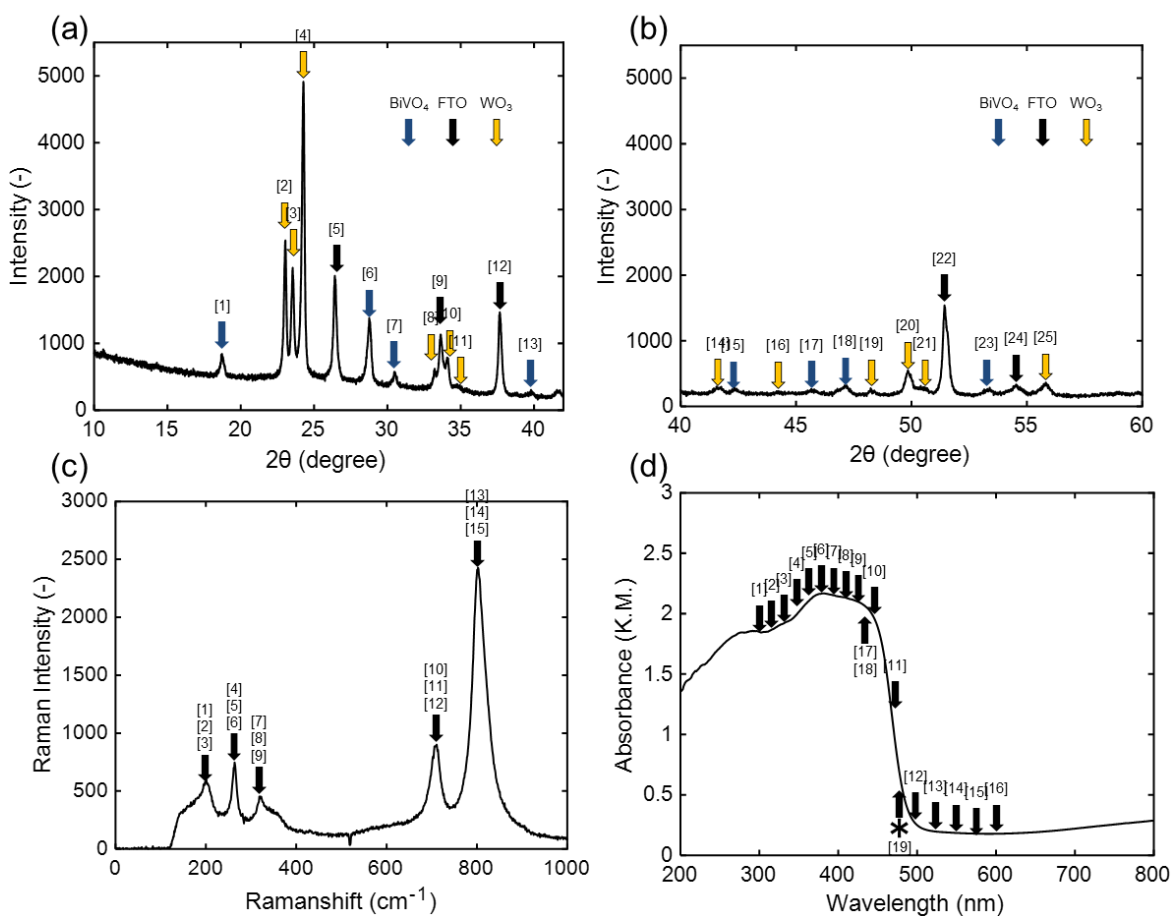

Figure S7 An example of the analytical data for  $\text{WO}_3/\text{BiVO}_4$  electrode is shown with an indication of features in the spectra and patterns; (a) XRD pattern with an angle of diffraction of between 10 and 42 degrees (b) XRD pattern with an angle of diffraction of between 42 and 60 degrees. (c) Raman spectrum, (d) DRS spectrum. The intensities, positions, and width were taken as feature values at the arrows and the slope was taken at (\*). For the Raman intensity, the ratios of the individual peaks in all the combinations have been taken. The name and explanation of these descriptors from the analytical data were shown in the following table.

Table S4 The abbreviations of the descriptor names for the analytical data in Figure S7 and their explanation.

| Analytical method                                                   | Descriptor name | Descriptor explanation                                    |                                                        |
|---------------------------------------------------------------------|-----------------|-----------------------------------------------------------|--------------------------------------------------------|
| UV vis DRS                                                          | [1] DRS_300nm   | Peak intensity at 300 nm                                  |                                                        |
|                                                                     | [2] DRS_320nm   | Peak intensity at 320 nm                                  |                                                        |
|                                                                     | [3] DRS_340nm   | Peak intensity at 340 nm                                  |                                                        |
|                                                                     | [4] DRS_360nm   | Peak intensity at 360 nm                                  |                                                        |
|                                                                     | [5] DRS_380nm   | Peak intensity at 380 nm                                  |                                                        |
|                                                                     | [6] DRS_400nm   | Peak intensity at 400 nm                                  |                                                        |
|                                                                     | [7] DRS_420nm   | Peak intensity at 420 nm                                  |                                                        |
|                                                                     | [8] DRS_440nm   | Peak intensity at 440 nm                                  |                                                        |
|                                                                     | [9] DRS_460nm   | Peak intensity at 460 nm                                  |                                                        |
|                                                                     | [10] DRS_480nm  | Peak intensity at 480 nm                                  |                                                        |
|                                                                     | [11] DRS_500nm  | Peak intensity at 500 nm                                  |                                                        |
|                                                                     | [12] DRS_520nm  | Peak intensity at 520 nm                                  |                                                        |
|                                                                     | [13] DRS_540nm  | Peak intensity at 540 nm                                  |                                                        |
|                                                                     | [14] DRS_560nm  | Peak intensity at 560 nm                                  |                                                        |
|                                                                     | [15] DRS_580nm  | Peak intensity at 580 nm                                  |                                                        |
|                                                                     | [16] DRS_600nm  | Peak intensity at 600 nm                                  |                                                        |
|                                                                     |                 | [17] DRS_shoulder_pk<br>[18] DRS_shoulder_loc             | Intensity and position of shoulder peak in 400 –500 nm |
|                                                                     |                 | [19] DRS_slope_ave                                        | Averaged slope in 450 –500 nm                          |
|                                                                     | Raman           | [1] Raman_pk1_int<br>[2] Raman_pk1_loc<br>[3] Raman_pk1_w | Intensity, position and width of peak 1                |
| [4] Raman_pk2_posi_int<br>[5] Raman_pk2_posi_loc<br>[6] Raman_pk2_w |                 | Intensity, position and width of peak 2                   |                                                        |
| [7] Raman_pk3_posi_int<br>[8] Raman_pk3_posi_loc<br>[9] Raman_pk3_w |                 | Intensity, position and width of peak 3                   |                                                        |

|     |                                                                        |                                         |
|-----|------------------------------------------------------------------------|-----------------------------------------|
|     | [10] Raman_pk4_posi_int<br>[11] Raman_pk4_posi_loc<br>[12] Raman_pk4_w | Intensity, position and width of peak 4 |
|     | [13] Raman_pk5_posi_int<br>[14] Raman_pk5_posi_loc<br>[15] Raman_pk5_w | Intensity, position and width of peak 1 |
|     | [16] Raman_ratio1                                                      | Ratio: (peak1/peak2)                    |
|     | [17] Raman_ratio2                                                      | Ratio: (peak1/peak3)                    |
|     | [18] Raman_ratio3                                                      | Ratio: (peak1/peak4)                    |
|     | [19] Raman_ratio4                                                      | Ratio: (peak1/peak5)                    |
|     | [20] Raman_ratio5                                                      | Ratio: (peak2/peak3)                    |
|     | [21] Raman_ratio6                                                      | Ratio: (peak2/peak4)                    |
|     | [22] Raman_ratio7                                                      | Ratio: (peak2/peak5)                    |
|     | [23] Raman_ratio8                                                      | Ratio: (peak3/peak4)                    |
|     | [24] Raman_ratio9                                                      | Ratio: (peak3/peak5)                    |
|     | [25] Raman_ratio10                                                     | Ratio: (peak4/peak5)                    |
| XRD | [1] XRD_pk1_int                                                        | Intensity at peak 1                     |
|     | [2] XRD_pk2_int                                                        | Intensity at peak 2                     |
|     | [3] XRD_pk3_int                                                        | Intensity at peak 3                     |
|     | [4] XRD_pk4_int                                                        | Intensity at peak 4                     |
|     | [5] XRD_pk5_int                                                        | Intensity at peak 5                     |
|     | [6] XRD_pk6_int                                                        | Intensity at peak 6                     |
|     | [7] XRD_pk7_int                                                        | Intensity at peak 7                     |
|     | [8] XRD_pk8_int                                                        | Intensity at peak 8                     |
|     | [9] XRD_pk9_int                                                        | Intensity at peak 9                     |
|     | [10] XRD_pk10_int                                                      | Intensity at peak 10                    |
|     | [11] XRD_pk11_int                                                      | Intensity at peak 11                    |
|     | [12] XRD_pk12_int                                                      | Intensity at peak 12                    |
|     | [13] XRD_pk13_int                                                      | Intensity at peak 13                    |
|     | [14] XRD_pk14_int                                                      | Intensity at peak 14                    |
|     | [15] XRD_pk15_int                                                      | Intensity at peak 15                    |
|     | [16] XRD_pk16_int                                                      | Intensity at peak 16                    |
|     | [17] XRD_pk17_int                                                      | Intensity at peak 17                    |
|     | [18] XRD_pk18_int                                                      | Intensity at peak 18                    |
|     | [19] XRD_pk19_int                                                      | Intensity at peak 19                    |



|      |                                    |                                                             |
|------|------------------------------------|-------------------------------------------------------------|
|      | [20] XRD_pk20_int                  | Intensity at peak 20                                        |
|      | [21] XRD_pk21_int                  | Intensity at peak 21                                        |
|      | [22] XRD_pk22_int                  | Intensity at peak 22                                        |
|      | [23] XRD_pk23_int                  | Intensity at peak 23                                        |
|      | [24] XRD_pk24_int                  | Intensity at peak 24                                        |
|      | [25] XRD_pk25_int                  | Intensity at peak 25                                        |
| PEIS | PEIS_R1, PEIS_R2, PEIS_C2, PEIS_n2 | Fitting parameters analyzed by the equivalent circuit model |

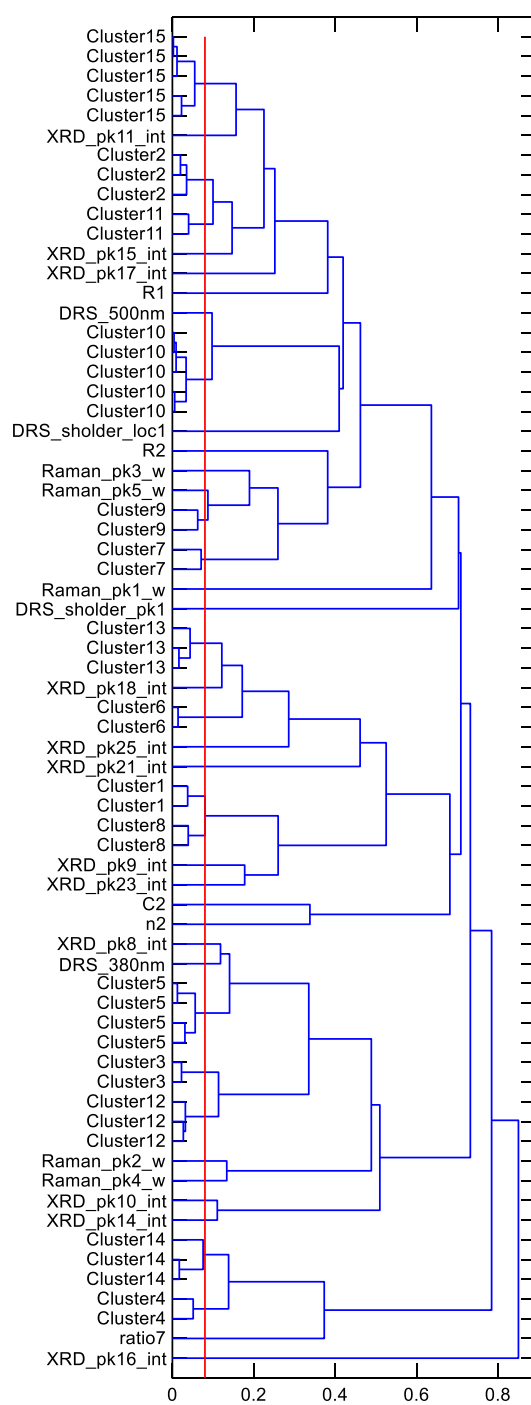

Figure S8 The dendrogram illustrates feature clustering for the analytical data features obtained from a  $\text{WO}_3/\text{BiVO}_4$  heterojunction photoanode. The horizontal axis depicts the absolute cosine distance, while the vertical axis displays the name of features. The red line represents the clustering threshold.

Table S5 The list of the clustered features for the analytical data features obtained from a WO<sub>3</sub>/ BiVO<sub>4</sub> heterojunction photoanode.

| Features name                                                    | Cluster index |
|------------------------------------------------------------------|---------------|
| XRD_pk5_int ,XRD_pk12_int                                        | 1             |
| XRD_pk1_int, XRD_p6_int,<br>DRS_480nm                            | 2             |
| Raman_pk1_int, Raman_pk3_int                                     | 3             |
| Raman_ratio6, Raman_ratio9                                       | 4             |
| DRS_300nm, DRS_320nm,<br>DRS_340nm, DRS_360nm                    | 5             |
| XRD_pk4_int, XRD_pk20_int                                        | 6             |
| Raman_ratio1, Raman_ratio5                                       | 7             |
| XRD_pk22_int, XRD_pk24_int                                       | 8             |
| Raman_ratio2, Raman_ratio10                                      | 9             |
| DRS_520nm, DRS_540nm,<br>DRS_560nm, DRS_580nm,<br>DRS_600nm,     | 10            |
| XRD_pk7_int, XRD_pk13_int                                        | 11            |
| Raman_pk2_int, Raman_pk4_int,<br>Raman_pk5_int                   | 12            |
| XRD_pk2_int, XRD_pk3_int,<br>XRD_pk19_int                        | 13            |
| Raman_ratio3, Raman_ratio4,<br>Raman_ratio8                      | 14            |
| DRS_400nm, DRS_420nm,<br>DRS_440nm,<br>DRS_460nm, DRS_slope_ave1 | 15            |

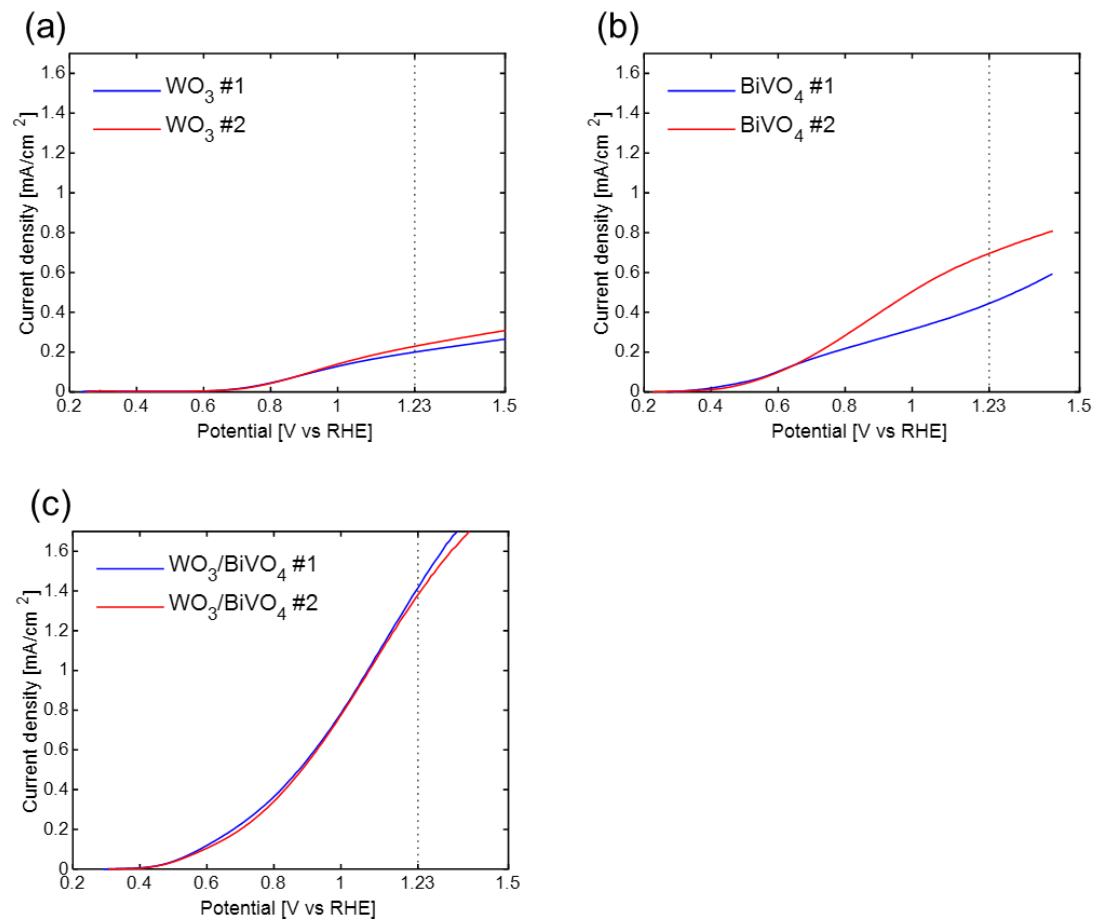

Figure S9 The current–voltage curves for WO<sub>3</sub>-only (a), BiVO<sub>4</sub>-only (b) and heterojunction samples (c) are shown. Two examples for each sample type are shown. The potential is indicated versus reversible hydrogen electrode (RHE).
